# Supplementary material for: Serological and Molecular Survey of Leishmania infantum in a Population of Iberian Lynxes (Lynx pardinus)
Source: MDPI journal article supplement (doi:10.3390/microorganisms10122447), 2022-12-11
Supplement: s1 [file s1]

## Supplementary Materials

**Table S1.** Descriptive statistics per each ELISA antigen and cut-off determination. Results obtained from average OD (optical densities) of at least two independent assays performed in technical triplicates. Cut-offs calculated by the average result of 75% quartile + 2x standard deviation (SD).

|                         | <b>SPLA</b><br><b>N=36</b> | <b>rK39</b><br><b>N=36</b> | <b>CPX</b><br><b>N=36</b> | <b>SECA</b><br><b>N=36</b> |
|-------------------------|----------------------------|----------------------------|---------------------------|----------------------------|
| Minimum                 | 0.004                      | 0.003                      | 0.000                     | 0.004                      |
| Maximum                 | 0.073                      | 0.098                      | 0.063                     | 0.076                      |
| Median                  | 0.009                      | 0.009                      | 0.010                     | 0.016                      |
| 25% percentile          | 0.005                      | 0.006                      | 0.006                     | 0.010                      |
| 75% percentile          | 0.013                      | 0.016                      | 0.014                     | 0.030                      |
| 95% CI of means         |                            |                            |                           |                            |
| Actual confidence level | 97.12%                     | 97.12%                     | 97.12%                    | 97.12%                     |
| Lower confidence limit  | 0.006                      | 0.007                      | 0.007                     | 0.012                      |
| Upper confidence limit  | 0.013                      | 0.015                      | 0.013                     | 0.024                      |
| Average                 | 0.012                      | 0.013                      | 0.013                     | 0.022                      |
| SD                      | 0.012                      | 0.016                      | 0.012                     | 0.018                      |
| SD Error of Mean        | 0.002                      | 0.003                      | 0.002                     | 0.003                      |

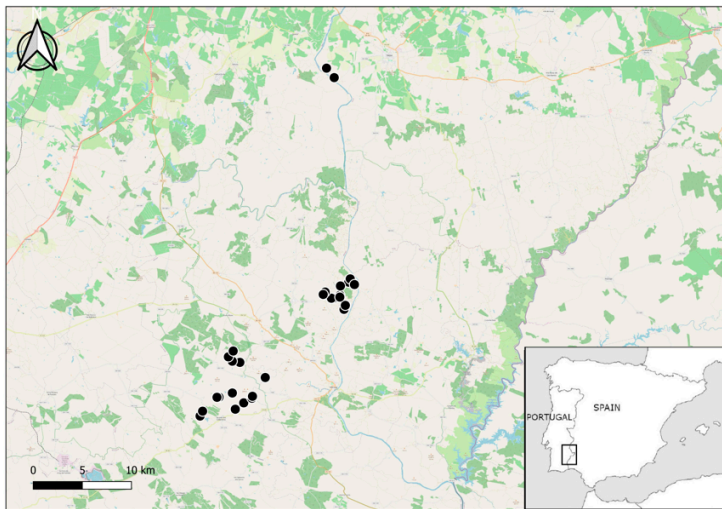

**Figure S1.** Representative map illustrating capture points alongside the Guadiana River Valley, southeast of the Alentejo region, southern Portugal. Black dots represent location of captured animals.

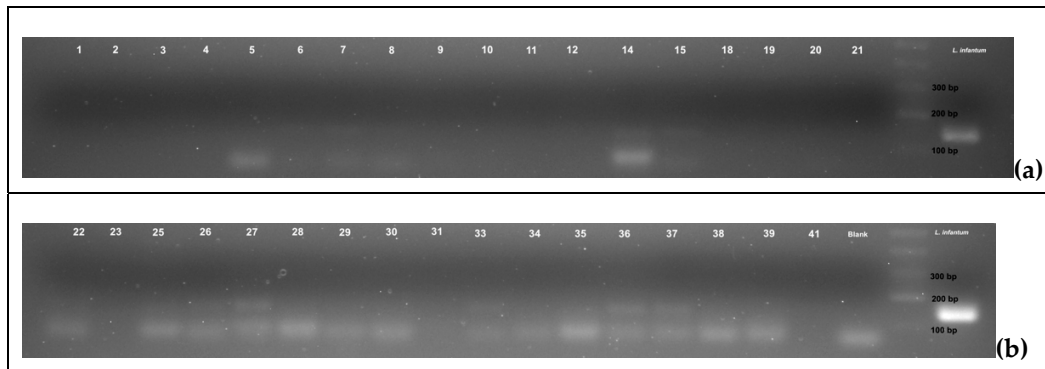

**Figure S2.** Representative image of *Leishmania* spp. minicircle kDNA detection by PCR (primers RV1 and RV2) on a 1.5% agarose gel electrophoresis, stained with 0.2  $\mu\text{g/mL}$  of nucleic acid stain with a 100 bp molecular marker (Ladder V, NZYTech, Portugal). Each lane is identified by the sample number. *L. infantum* positive control presents a 145 bp band. (a) Positive samples: 6, 7, 14 and 15. (b) Positive samples: 27, 33, 36, 37.

```

Lynx27      CTGGATCATTTCCGATGATTACCCCAAAAA--CATATACAACCTCGGGAGACCTATG
Lynx37      CTGGATCATTTCCGATGATTACCCCAAAAA--CATATACAACCTCGGGAGACCTATG
MHOM/PT/00/IMT260 CTGGATCATTTCCGATGATTACCCCAAAAA--CATATACAACCTCGGGAGACCTATG
MHOM/ES/86/BCN16 CTGGATCATTTCCGATGATTACCCCAAAAA--CATATACAACCTCGGGAGACCTATG
MHOM/TI/00/IPT1   CTGGATCATTTCCGATGATTACCCCAAAAA--CATATACAACCTCGGGAGACCTATG
MHOM/CI/00/Wangjie1. CTGGATCATTTCCGATGATTACCCCAAAAA--CATATACAACCTCGGGAGACCTATG
MHOM/SD/62/35     CTGGATCATTTCCGATGATTACCCCAAAAA--CATATACAACCTCGGGAGACCTATG
MHOM/SD/97/LEH3472 CTGGATCATTTCCGATGATTACCCCAAAAA--CATATACAACCTCGGGAGACCTATG
*****

Lynx27      TATATATAT---GTAGGCCTTTCCACATACACAGCAAAAGTTTGTACTCAAAATTGCG
Lynx37      TATATATAT---GTAGGCCTTTCCACATACACAGCAAAAGTTTGTACTCAAAATTGCG
MHOM/PT/00/IMT260 TATATATAT---GTAGGCCTTTCCACATACACAGCAAAAGTTTGTACTCAAAATTGCG
MHOM/ES/86/BCN16 TATATATAT---GTAGGCCTTTCCACATACACAGCAAAAGTTTGTACTCAAAATTGCG
MHOM/TI/00/IPT1   TATATATAT---GTAGGCCTTTCCACATACACAGCAAAAGTTTGTACTCAAAATTGCG
MHOM/CI/00/Wangjie1. TATATATAT---GTAGGCCTTTCCACATACACAGCAAAAGTTTGTACTCAAAATTGCG
MHOM/SD/62/35     TATATATATATGTAGGCCTTTCCACATACACAGCAAAAGTTTGTACTCAAAATTGCG
MHOM/SD/97/LEH3472 TATATATATAT---GTAGGCCTTTCCACATACACAGCAAAAGTTTGTACTCAAAATTGCG
*****

Lynx27      AGTAAAAAAGGCGATCGACGTTATACGCGACCGCTATACAAAGCAAAATGTCCG
Lynx37      AGTAAAAAAGGCGATCGACGTTATACGCGACCGCTATACAAAGCAAAATGTCCG
MHOM/PT/00/IMT260 AGTAAAAAAGGCGATCGACGTTATACGCGACCGCTATACAAAGCAAAATGTCCG
MHOM/ES/86/BCN16 AGTAAAAAAGGCGATCGACGTTATACGCGACCGCTATACAAAGCAAAATGTCCG
MHOM/TI/00/IPT1   AGTAAAAAAGGCGATCGACGTTATACGCGACCGCTATACAAAGCAAAATGTCCG
MHOM/CI/00/Wangjie1. AGTAAAAAAGGCGATCGACGTTATACGCGACCGCTATACAAAGCAAAATGTCCG
MHOM/SD/62/35     AGTAAAAAAGGCGATCGACGTTATACGCGACCGCTATACAAAGCAAAATGTCCG
MHOM/SD/97/LEH3472 AGTAAAAAAGGCGATCGACGTTATACGCGACCGCTATACAAAGCAAAATGTCCG
*****

Lynx27      TTTATACAAAAATATACGGCGTTTCGGTTTTTGGCGGGGTGGGTGCGTGTGTGGATAAC
Lynx37      TTTATACAAAAATATACGGCGTTTCGGTTTTTGGCGGGGTGGGTGCGTGTGTGGATAAC
MHOM/PT/00/IMT260 TTTATACAAAAATATACGGCGTTTCGGTTTTTGGCGGGGTGGGTGCGTGTGTGGATAAC
MHOM/ES/86/BCN16 TTTATACAAAAATATACGGCGTTTCGGTTTTTGGCGGGGTGGGTGCGTGTGTGGATAAC
MHOM/TI/00/IPT1   TTTATACAAAAATATACGGCGTTTCGGTTTTTGGCGGGGTGGGTGCGTGTGTGGATAAC
MHOM/CI/00/Wangjie1. TTTATACAAAAATATACGGCGTTTCGGTTTTTGGCGGGGTGGGTGCGTGTGTGGATAAC
MHOM/SD/62/35     TTTATACAAAAATATACGGCGTTTCGGTTTTTGGCGGGGTGGGTGCGTGTGTGGATAAC
MHOM/SD/97/LEH3472 TTTATACAAAAATATACGGCGTTTCGGTTTTTGGCGGGGTGGGTGCGTGTGTGGATAAC
*****

Lynx27      GGCTCACATAACGTGTCGCGATGGATGACTTGGCTTCCTATTTCGTTGAAGAACGCAGTA
Lynx37      GGCTCACATAACGTGTCGCGATGGATGACTTGGCTTCCTATTTCGTTGAAGAACGCAGTA
MHOM/PT/00/IMT260 GGCTCACATAACGTGTCGCGATGGATGACTTGGCTTCCTATTTCGTTGAAGAACGCAGTA
MHOM/ES/86/BCN16 GGCTCACATAACGTGTCGCGATGGATGACTTGGCTTCCTATTTCGTTGAAGAACGCAGTA
MHOM/TI/00/IPT1   GGCTCACATAACGTGTCGCGATGGATGACTTGGCTTCCTATTTCGTTGAAGAACGCAGTA
MHOM/CI/00/Wangjie1. GGCTCACATAACGTGTCGCGATGGATGACTTGGCTTCCTATTTCGTTGAAGAACGCAGTA
MHOM/SD/62/35     GGCTCACATAACGTGTCGCGATGGATGACTTGGCTTCCTATTTCGTTGAAGAACGCAGTA
MHOM/SD/97/LEH3472 GGCTCACATAACGTGTCGCGATGGATGACTTGGCTTCCTATTTCGTTGAAGAACGCAGTA
*****

Lynx27      AAGTGGGATAAGTGGTATCAA
Lynx37      AAGTGGGATAAGTGGTATCAA
MHOM/PT/00/IMT260 AAGTGGGATAAGTGGTATCAA
MHOM/ES/86/BCN16 AAGTGGGATAAGTGGTATCAA
MHOM/TI/00/IPT1   AAGTGGGATAAGTGGTATCAA
MHOM/CI/00/Wangjie1. AAGTGGGATAAGTGGTATCAA
MHOM/SD/62/35     AAGTGGGATAAGTGGTATCAA
MHOM/SD/97/LEH3472 AAGTGGGATAAGTGGTATCAA
*****

```

**Figure S3.** *Leishmania infantum* ITS-1 sequences and main polymorphic regions from samples 27 and 37. Multiple sequence alignment was performed using the sequences from Lynxes samples 27, 37 and six other *L. infantum* strains. In red are highlighted polymorphic regions used to define the ITS sequence type.

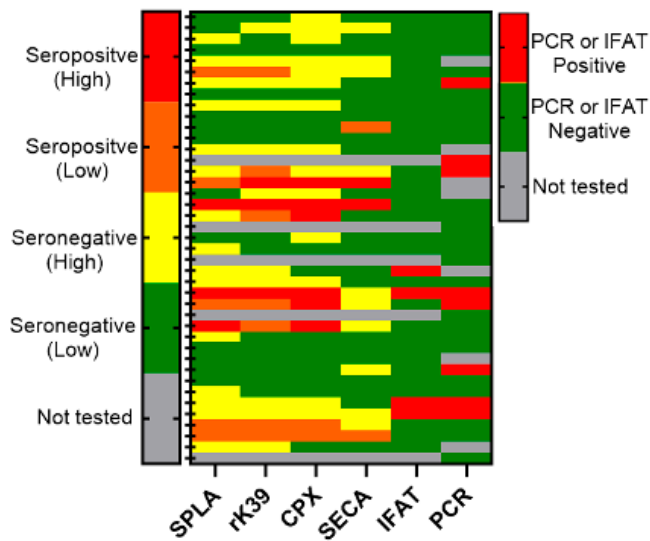

**Figure S4.** Categorical representation of ELISA seroreactivity against SPLA, rK39, CPX and SECA, in conjugation to PCR and IFAT results. Stratification of ELISA seroreactivity by antigen into “high seropositive” (higher than 1.5x above the cut-off, red color); “low seropositive” (between 1 and 1.5x the cut-off, orange color); “high seronegative” (between 1 and 0.5x the cut-off, yellow color) and “low seronegative” (lower than 0.5x the cut-off, green color).

|      | SPLA | rK39                   | CPX                    | SECA                   |
|------|------|------------------------|------------------------|------------------------|
| SPLA |      | 0,88<br>(0.77 to 0.94) | 0,73<br>(0.52 to 0.86) | 0,49<br>(0.18 to 0.71) |
| rK39 |      |                        | 0,87<br>(0.75 to 0.93) | 0,64<br>(0.39 to 0.80) |
| CPX  |      |                        |                        | 0,52<br>(0.22 to 0.73) |

**Figure S5.** Correlation analysis for all samples reporting Spearman’s  $r_s$  values calculated with 95% confidence interval (IC). A very strong correlation is considered for  $0.9 > r < 1$ ; strong correlation is considered for  $0.7 > r < 0.89$ ; moderate correlation is considered for  $0.4 > r < 0.69$ ; weak correlation is considered for  $0.4 > r < 0.69$  and very weak correlation for  $r < 0.19$ ; confidence interval of 95% is reported in brackets below  $r$  value.

|     |                     |      |      |          |          |          |
|-----|---------------------|------|------|----------|----------|----------|
| (a) | All Samples         |      | SPLA | rK39     | CPX      | SECA     |
|     |                     | SPLA |      | 1,23E-12 | 3,89E-07 | 2,23E-03 |
|     |                     | rK39 |      |          | 6,82E-12 | 2,34E-05 |
|     |                     | CPX  |      |          |          | 1,10E-03 |
|     |                     | SECA |      |          |          |          |
| (b) | Seropositive        |      | SPLA | rK39     | CPX      | SECA     |
|     |                     | SPLA |      | 3,75E-05 | 7,89E-03 | 0,24     |
|     |                     | rK39 |      |          | 3,10E-03 | 0,20     |
|     |                     | CPX  |      |          |          | 0,59     |
|     |                     | SECA |      |          |          |          |
| (c) | Seronegative        |      | SPLA | rK39     | CPX      | SECA     |
|     |                     | SPLA |      | 5,69E-05 | 0,08     | 0,88     |
|     |                     | rK39 |      |          | 1,77E-04 | 0,14     |
|     |                     | CPX  |      |          |          | 0,73     |
|     |                     | SECA |      |          |          |          |
| (d) | Seronegative (High) |      | SPLA | rK39     | CPX      | SECA     |
|     |                     | SPLA |      | 2,18E-03 | 0,509    | 0,51     |
|     |                     | rK39 |      |          | 0,014    | 0,07     |
|     |                     | CPX  |      |          |          | 0,16     |
|     |                     | SECA |      |          |          |          |
| (e) | Seronegative (Low)  |      | SPLA | rK39     | CPX      | SECA     |
|     |                     | SPLA |      | 0,53     | 0,81     | 0,53     |
|     |                     | rK39 |      |          | 0,12     | 0,45     |
|     |                     | CPX  |      |          |          | 0,91     |
|     |                     | SECA |      |          |          |          |

**Figure S6.** Representation of *p*-values associated to the Spearman's correlation analysis of ELISA seroreactivity reported in Figures 1 and 2.
